# Supplementary material for: The IDO1 selective inhibitor epacadostat enhances dendritic cell immunogenicity and lytic ability of tumor antigen-specific T cells
Source: PubMed Central journal article supplement (PMC5122347; doi:10.18632/oncotarget.9326), 2016-05-12
Supplement: oncotarget-07-37762-s001.pdf [file oncotarget-07-37762-s001.pdf]

## The IDO1 selective inhibitor epacadostat enhances dendritic cell immunogenicity and lytic ability of tumor antigen-specific T cells

### Supplementary Materials

#### Supplemental Table S1: Complete list of 123 peripheral immune cell subsets analyzed by flow cytometry

##### 1. Total CD4<sup>+</sup> T cells

- PD-L1<sup>+</sup> CD4
- PD-1<sup>+</sup> CD4
- CTLA-4<sup>+</sup> CD4
- Tim-3<sup>+</sup> CD4
- 41BB<sup>+</sup> CD4
- ICOS<sup>+</sup> CD4
  - PD-L1<sup>+</sup> ICOS<sup>+</sup> CD4
  - PD-1<sup>+</sup> ICOS<sup>+</sup> CD4
- Total naïve (CCR7<sup>+</sup>CD45RA<sup>+</sup>) CD4
  - PD-L1<sup>+</sup> naïve CD4
  - PD-1<sup>+</sup> naïve CD4
  - CTLA-4<sup>+</sup> naïve CD4
  - Tim-3<sup>+</sup> naïve CD4
  - 41BB<sup>+</sup> naïve CD4
- Total central memory (CCR7<sup>+</sup>CD45RA<sup>-</sup>) CD4
  - PD-L1<sup>+</sup> CM CD4
  - PD-1<sup>+</sup> CM CD4
  - CTLA-4<sup>+</sup> CM CD4
  - Tim-3<sup>+</sup> CM CD4
  - 41BB<sup>+</sup> CM CD4
- Total effector memory (CCR7<sup>-</sup>CD45RA<sup>-</sup>) CD4
  - PD-L1<sup>+</sup> EM CD4
  - PD-1<sup>+</sup> EM CD4
  - CTLA-4<sup>+</sup> EM CD4
  - Tim-3<sup>+</sup> EM CD4
  - 41BB<sup>+</sup> EM CD4
- Total EMRA (CCR7<sup>-</sup>CD45RA<sup>+</sup>) CD4
  - PD-L1<sup>+</sup> EMRA CD4
  - PD-1<sup>+</sup> EMRA CD4
  - CTLA-4<sup>+</sup> EMRA CD4
  - Tim-3<sup>+</sup> EMRA CD4
  - 41BB<sup>+</sup> EMRA CD4

##### 2. Total CD8<sup>+</sup> T cells

- PD-L1<sup>+</sup> CD8
- PD-1<sup>+</sup> CD8
- CTLA-4<sup>+</sup> CD8
- Tim-3<sup>+</sup> CD8
- 41BB<sup>+</sup> CD8
  - Total naïve (CCR7<sup>+</sup>CD45RA<sup>+</sup>) CD8
  - PD-L1<sup>+</sup> naïve CD8
  - PD-1<sup>+</sup> naïve CD8
  - CTLA-4<sup>+</sup> naïve CD8
  - Tim-3<sup>+</sup> naïve CD8
  - 41BB<sup>+</sup> naïve CD8
- Total central memory (CCR7<sup>+</sup>CD45RA<sup>-</sup>) CD8
  - PD-L1<sup>+</sup> CM CD8
  - PD-1<sup>+</sup> CM CD8
  - CTLA-4<sup>+</sup> CM CD8
  - Tim-3<sup>+</sup> CM CD8
  - 41BB<sup>+</sup> CM CD8
- Total effector memory (CCR7<sup>-</sup>CD45RA<sup>-</sup>) CD8
  - PD-L1<sup>+</sup> EM CD8
  - PD-1<sup>+</sup> EM CD8
  - CTLA-4<sup>+</sup> EM CD8
  - Tim-3<sup>+</sup> EM CD8
  - 41BB<sup>+</sup> EM CD8
- Total EMRA (CCR7<sup>-</sup>CD45RA<sup>+</sup>) CD8
  - PD-L1<sup>+</sup> EMRA CD8
  - PD-1<sup>+</sup> EMRA CD8
  - CTLA-4<sup>+</sup> EMRA CD8
  - Tim-3<sup>+</sup> EMRA CD8
  - 41BB<sup>+</sup> EMRA CD8

##### 3. Total Tregs

- PD-L1<sup>+</sup> Tregs
- PD-1<sup>+</sup> Tregs

- CTLA-4<sup>+</sup> Tregs
- ICOS<sup>+</sup> Tregs
- CD45RA<sup>+</sup> Tregs
- CD49d<sup>-</sup> Tregs

#### 4. Total B cells

- PD-L1<sup>+</sup> B cells
- PD-1<sup>+</sup> B cells

#### 5. Total NK

- PD-L1<sup>+</sup> NK
- PD-1<sup>+</sup> NK
- Tim-3<sup>+</sup> NK
- Total mature (CD16<sup>+</sup> CD56<sup>dim</sup>) NK
  - PD-L1<sup>+</sup> mature NK
  - PD-1<sup>+</sup> mature NK
  - Tim-3<sup>+</sup> mature NK
- Total functional intermediate (CD16<sup>+</sup> CD56<sup>br</sup>) NK
  - PD-L1<sup>+</sup> functional intermediate NK
  - PD-1<sup>+</sup> functional intermediate NK
  - Tim-3<sup>+</sup> functional intermediate NK
- Total immature (CD16<sup>-</sup> CD56<sup>br</sup>) NK
  - PD-L1<sup>+</sup> immature NK
  - PD-1<sup>+</sup> immature NK
  - Tim-3<sup>+</sup> immature NK
- Total unconventional (CD16<sup>-</sup> CD56<sup>dim</sup>) NK
  - PD-L1<sup>+</sup> unconventional NK
  - PD-1<sup>+</sup> unconventional NK
  - Tim-3<sup>+</sup> unconventional NK

#### 6. Total NK-T

- PD-L1<sup>+</sup> NK-T
- PD-1<sup>+</sup> NK-T
- Tim-3<sup>+</sup> NK-T

#### 7. Total cDC

- PD-L1<sup>+</sup> cDC
- PD-1<sup>+</sup> cDC
- CD83<sup>+</sup> cDC
- Tim-3<sup>+</sup> cDC

#### 8. Total pDC

- PD-L1<sup>+</sup> pDC
- PD-1<sup>+</sup> pDC
- CD83<sup>+</sup> pDC
- Tim-3<sup>+</sup> pDC

#### 9. Total MDSC

- PD-L1<sup>+</sup> MDSC
- PD-1<sup>+</sup> MDSC
- CD16<sup>+</sup> MDSC
- Total monocytic (CD14<sup>+</sup> CD15<sup>-</sup>) MDSC
  - PD-L1<sup>+</sup> mMDSC
  - PD-1<sup>+</sup> mMDSC
  - CD16<sup>+</sup> mMDSC
- Total granulocytic (CD14<sup>-</sup> CD15<sup>+</sup>) MDSC
  - PD-L1<sup>+</sup> gMDSC
  - PD-1<sup>+</sup> gMDSC
  - CD16<sup>+</sup> gMDSC
- Total lineage negative (CD14<sup>-</sup> CD15<sup>-</sup>) MDSC
  - PD-L1<sup>+</sup> lin neg MDSC
  - PD-1<sup>+</sup> lin neg MDSC
  - CD16<sup>+</sup> lin neg MDSC

Nine standard subsets were identified as well as 114 subsets relating to maturation and function within the standard subsets. cDC, conventional dendritic cells; CM, central memory; CTLA-4, cytotoxic T lymphocyte-associated protein-4; EM, effector memory; EMRA, terminally differentiated effector memory; FoxP3, forkhead box P3; gMDSCs, granulocytic mononuclear derived suppressor cells; ICOS, inducible T cell co-stimulator; lin neg MDSCs, lineage negative MDSCs; mMDSCs, monocytic MDSCs; NK, natural killer; pDC, plasmacytoid DC; PD-1, programmed cell death-1; PD-L1, programmed cell death ligand-1; Tim-3, T cell immunoglobulin and mucin domain-3; Tregs, regulatory T cells.

**Supplemental Table S2: Antibodies used for 4 panel stain to identify 123 peripheral immune cell subsets**

| Fluorochrome       | Panel 1                               | Panel 2                                 | Panel 3                              | Panel 4                              |
|--------------------|---------------------------------------|-----------------------------------------|--------------------------------------|--------------------------------------|
| <b>FITC</b>        | <u>CTLA-4</u><br>(A3.4H2.H12, LS Bio) | <u>CTLA-4</u><br>(A3.4H2.H12, LS Bio)   | <u>CD3</u><br>(HIT3a, Biolegend)     | <u>CD15</u><br>(HI98, Biolegend)     |
| <b>PE</b>          | <u>PD-1</u><br>(EH12.2H7, Biolegend)  | <u>PD-1</u><br>(EH12.2H7, Biolegend)    | <u>PD-1</u><br>(EH12.2H7, Biolegend) | <u>PD-1</u><br>(EH12.2H7, Biolegend) |
| <b>PerCP-Cy5.5</b> | <u>41BB</u><br>(4B4-1, Biolegend)     | <u>ICOS</u><br>(C398.4A, Biolegend)     | <u>CD303</u><br>(201A, Biolegend)    | <u>CD19</u><br>(HIB19, Biolegend)    |
| <b>PECy7</b>       | <u>PD-L1</u><br>(MIH1, BD)            | <u>PD-L1</u><br>(MIH1, BD)              | <u>PD-L1</u><br>(MIH1, BD)           | <u>PD-L1</u><br>(MIH1, BD)           |
| <b>BV421</b>       | <u>Tim-3</u><br>(F38-2E2, Biolegend)  | <u>FoxP3</u><br>(206D, Biolegend)       | <u>Tim-3</u><br>(F38-2E2, Biolegend) | <u>CD14</u><br>(M5E2, Biolegend)     |
| <b>V500</b>        | <u>CCR7</u><br>(G043H7, Biolegend)    | <u>CD49d</u><br>(9F10, Biolegend)       | <u>CD83</u><br>(HB15e, BD)           | <u>CD16</u><br>(3G8, Biolegend)      |
| <b>BV605</b>       | <u>CD4</u><br>(OKT4, Biolegend)       | <u>CD4</u><br>(OKT4, Biolegend)         | <u>CD56</u><br>(HCD56, Biolegend)    | <u>HLA-DR</u><br>(L243, Biolegend)   |
| <b>Dapi</b>        | <u>Live/Dead</u><br>(Invitrogen)      | <u>Live/Dead</u><br>(Invitrogen)        | <u>Live/Dead</u><br>(Invitrogen)     | <u>Live/Dead</u><br>(Invitrogen)     |
| <b>APC</b>         | -                                     | <u>CD25</u><br>(M-A251, Biolegend)      | <u>HLA-DR</u><br>(L243, Biolegend)   | <u>CD33</u><br>(WM53, Biolegend)     |
| <b>AF700</b>       | <u>CD45RA</u><br>(HI100, Biolegend)   | <u>CD45RA</u><br>(HI100, Biolegend)     | <u>CD16</u><br>(3G8, Biolegend)      | -                                    |
| <b>APC Cy7</b>     | <u>CD8</u><br>(RPA-T8, Biolegend)     | <u>CD127</u><br>(eBioRDR5, Ebioscience) | <u>CD1c</u><br>(L161, Biolegend)     | <u>CD11b</u><br>(M1/70, Biolegend)   |

Panel 1: CD4<sup>+</sup> T cells, CD8<sup>+</sup> T cells; Panel 2: Tregs; Panel 3: NK, NK-T, cDC, pDC; Panel 4: B cells, MDSC. Intracellular antibodies are underlined, and clones and companies are listed under each antibody.

cDC, conventional dendritic cells; CTLA-4, cytotoxic T lymphocyte-associated protein-4; FoxP3, forkhead box P3; HLA, human leukocyte antigen; ICOS, inducible T cell co-stimulator; MDSC, myeloid derived suppressor cells; NK, natural killer; pDC, plasmacytoid DC; PD-1, programmed cell death-1; PD-L1, programmed cell death ligand-1; Tim-3, T cell immunoglobulin and mucin domain-3; Tregs, regulatory T cells.
